# Supplementary material
Source: ML conference proceedings conference paper supplement (https://openreview.net/forum?id=bpdIZTIVq8)
Supplement: supplementary_material [file attachment]

# IGOR: IMAGE-GOAL REPRESENTATIONS ARE THE ATOMIC BUILDING BLOCKS FOR NEXT-LEVEL GENERALIZATION IN EMBODIED AI

Anonymous authors

Paper under double-blind review

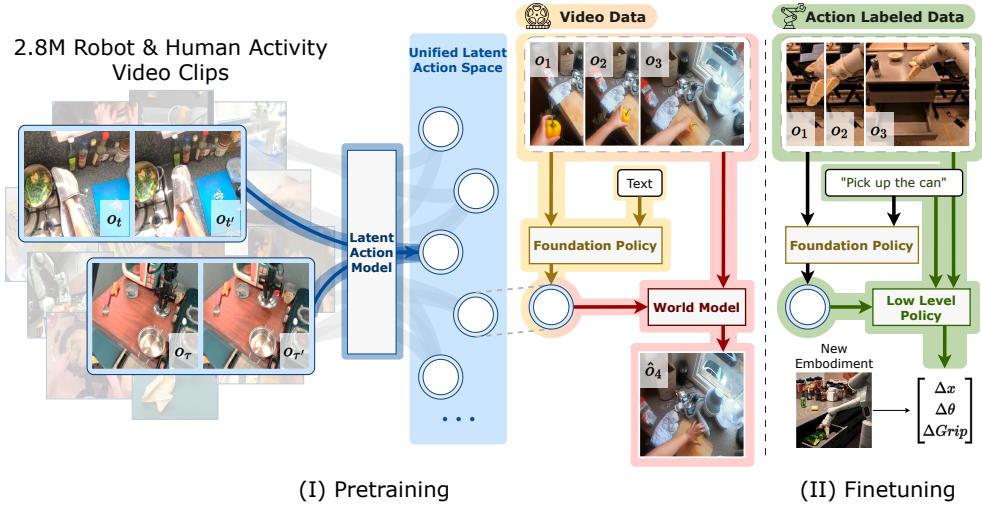

Figure 1: **Image-GOal Representations (IGOR) based training framework for embodied AI.** IGOR learns a unified latent action space for humans and robots by compressing visual changes between an image and its goal state on data from both robot and human activities. By labeling latent actions, IGOR facilitates the learning of foundation policy and world models from internet-scale human video data, covering a diverse range of embodied AI tasks. With a semantically consistent latent action space, IGOR enables human-to-robot generalization. The foundation policy model acts as a high-level controller at the latent action level, which is then integrated with a low-level policy to achieve effective robot control.

## ABSTRACT

We introduce Image-GOal Representations (IGOR), aiming to learn a unified, semantically consistent action space across human and various robots. Through this unified latent action space, IGOR enables knowledge transfer among large-scale robot and human activity data. We achieve this by compressing visual changes between an initial image and its goal state into latent actions. IGOR allows us to generate latent action labels for internet-scale video data. This unified latent action space enables the training of foundation policy and world models across a wide variety of tasks performed by both robots and humans. We demonstrate that: (1) IGOR learns a semantically consistent action space for both human and robots, characterizing various possible motions of objects representing the physical interaction knowledge; (2) IGOR can “migrate” the movements of the object in the one video to other videos, even across human and robots, by jointly using the latent action model and world model; (3) IGOR can learn to align latent actions with natural language through the foundation policy model, and integrate latent actions with a low-level policy model to achieve effective robot control. We believe IGOR opens new possibilities for human-to-robot knowledge transfer and control. See video demonstrations on our anonymous [webpage](#).

# 1 INTRODUCTION

Learning foundation models for embodied AI has been notably constrained by a lack of interaction data. Unlike text or video data, which are abundantly available, interaction data is much scarcer. Research efforts have been devoted to creating large-scale interaction dataset, such as Open-X-Embodiment (Collaboration et al., 2023) and DROID (Khazatsky et al., 2024). Based on multi-task interaction data, a series of generalist agents (or foundation policy models) have been proposed, such as RT-1 (Brohan et al., 2022), Robocat (Bousmalis et al., 2023), RT-2 (Brohan et al., 2023), Octo (Team et al., 2024), and OpenVLA (Kim et al., 2024). However, the volume of interaction data remains several orders of magnitude smaller than that of internet text or video data. Given that the success of foundation models relies on scaling up datasets and extracting knowledge from such large-scale datasets, it is essential to design methods for building embodied AI foundation models that can effectively utilize internet-scale video data.

Internet-scale video data contains abundant sequential record of human activities and perfect demonstrations of how human perform various tasks by interacting with the real world. When human brain extracts information from videos, instead of doing it frame by frame, it modularizes the differences between frames into a single word such as “move”, “open”, “close”. We refer to these highly compressed, modularized actions as latent actions that are shared across different tasks. The question to ask here is, **is it possible to extract all possible latent actions from video datasets with humans and robots performing various real embodied AI tasks, and further recover them?** While recent works such as Genie (Bruce et al., 2024) and LAPO (Schmidt & Jiang, 2023) made attempts in recovering such latent actions from videos, they primarily focus on 2D platformer games where each latent action  $a_t$  corresponds to a specific control button. The action space is highly designed to fit a specific scenario and incomparable to the complex human and robot action space in various embodied AI tasks. To take a step further, the question would be, **can we learn a unified, semantically consistent latent action space, allowing the transfer of knowledge across different tasks, and embodiments including human and various robots?**

In this paper, we propose Image-GOal Representations (IGOR), which learns a unified and semantically consistent latent action space shared across different tasks and embodiments, enabling the knowledge transfer among internet-scale video data. We propose a latent action model designed to capture robot and human actions across various embodied AI tasks. IGOR compresses the visual changes between an image and its goal state into latent actions, which are also embeddings of sub-tasks defined by reaching the goal from the initial image. IGOR is trained by minimizing the reconstruction loss of the goal state, which is predicted based on the image and the latent action. The core insight behind IGOR is that if compressed sufficiently, the image-goal pairs with similar visual changes will have similar embeddings.

*We argue that, besides text embeddings for human instruction understanding and image/video embeddings for state understanding, image-goal representations for sub-task understanding and latent action learning are yet another crucial building blocks, which may hold great potential for next-level generalization in embodied AI.*

With the latent action model, we can transform internet-scale human video data into interaction data labeled with latent actions, which largely expands the data available to building embodied AI foundation models. This unified latent action space allows us to train foundation policy and world models on nearly arbitrary tasks performed by robots and humans. Specifically, we train a foundation policy model on large-scale video data with text labels. This model uses text to describe tasks and makes decisions, generating the next latent action to perform. Additionally, we train a foundation world model on the same dataset, learning to simulate the outcome of executing the foundation policy model.

We train our models on human video data and robot data with actions removed, with the RT-1 dataset held out for OOD evaluation. First, we evaluate the latent action model qualitatively, and find that image-goal pairs with similar latent actions have similar visual changes, corresponding to semantically consistent movements, even on OOD scenarios. Then we evaluate the world model by extracting latent actions from a video and applying such latent action (or action sequence) to the initial frames of other videos, generating the rest of frames. We find that, jointly with action model

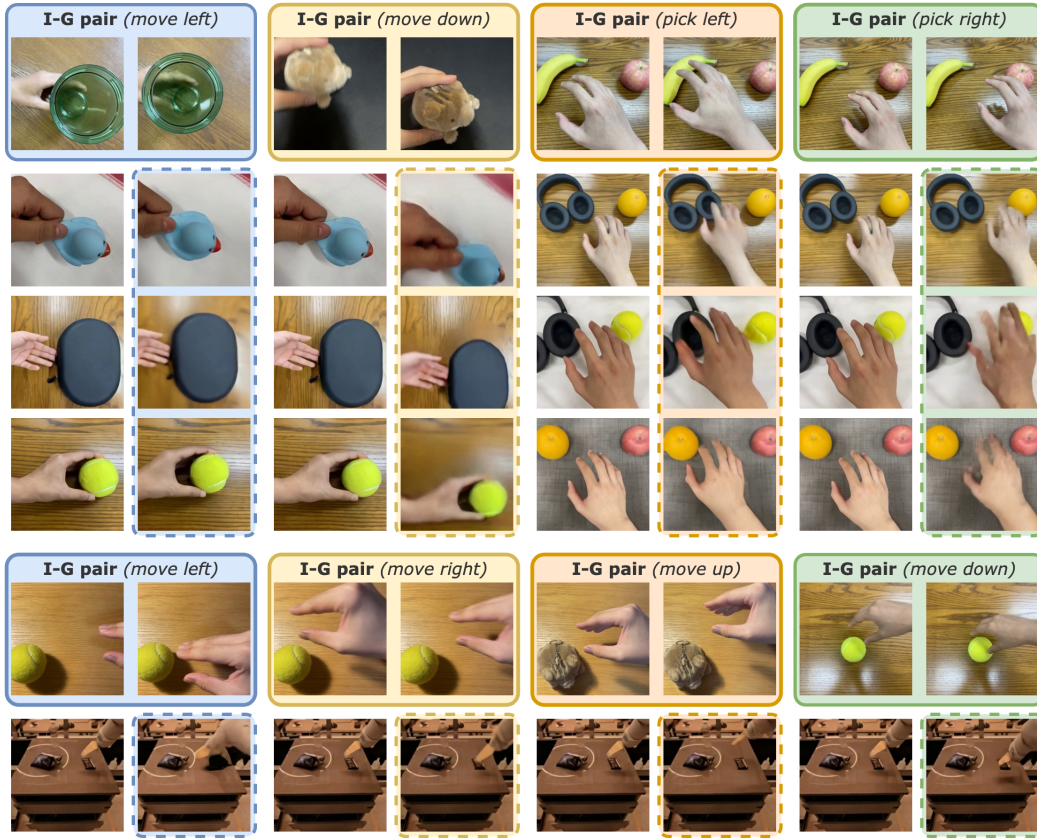

Figure 2: We extract latent actions from Image-Goal (I-G) pairs in the solid line boxes, and apply the latent actions to different initial frames, generating subsequent videos via world model as shown in the corresponding dashed boxes. The first half illustrates examples from real-world videos with diverse object categories, while the second half demonstrates generalization from human to robot arms. Full videos are available on our [website](#).

and world model, IGOR successfully “migrates” the movements of the object in the one video to other videos, as shown in Figure 2. We also apply different latent actions to the same initial image, and find that the world model has learned various possible movements of the object in the image, suggesting that it has absorbed the physical interaction knowledge. For the foundation policy model, we show its ability in following diverse language instruction via iteratively rollout the foundation policy and world model using latent actions. We further integrate it with a low-level policy, and show that IGOR-based policy training can improve performance on Google Robot tasks in low-data regime with the SIMPLER (Li et al., 2024) simulator.

## 2 METHODOLOGY

### 2.1 LATENT ACTION MODEL

The primary objective of the latent action model is to label latent actions from unlabeled open-domain videos in an unsupervised manner. Given a sequence of video frames  $o_{1:t+1}$ , the goal is to derive the latent action  $a_t$ , which captures the key information describing only the changes that occur at time step  $t$ , removing other redundant information. In contrast to prior works (Schmidt & Jiang, 2023; Bruce et al., 2024), which primarily focus on 2D platformer games where each latent action  $a_t$  corresponds to a specific control button, we aim to develop a more generalizable model. Our model is designed to handle the significantly greater complexity of open-world scenarios, where latent actions may not correspond to any specific underlying actions. This presents several additional challenges.

First, rather than focusing solely on absolute position of pixel changes, the latent action model must learn to capture semantic movements that remain consistent across varying scenarios. Moreover, due to the temporal redundancy, actions are often sparse given long contexts, which can lead the model to infer  $o_{t+1}$  directly from the history, bypassing the need for a more informative latent action  $a_t$ .

To address these issues, we propose a novel model architecture. Our latent action model consists of a pair of Inverse Dynamics Model (IDM) and Forward Dynamics Model (FDM). IDM  $I$  is trained to predict the latent action  $a_t$  based on the full sequence of observations  $o_{1:t+1}$ . Instead of using the raw observations, we first apply random cropping  $c_1$  to the inputs:  $a_t = I(c_1[o_{1:t+1}])$ . For the architecture of  $I$ , we first extract features for each frame through Vision Transformer (ViT) (Dosovitskiy et al., 2021) and then adopt a Spatio-Temporal transformer (ST-transformer) (Bruce et al., 2024; Xu et al., 2021) with a temporal causal mask as the backbone. Learnable readout tokens are then used to extract and compress the visual changes into  $N$  tokens. To further compress the information stored in latent action, we apply vector quantization to each token, restricting them to a discrete codebook of size  $|C|$ . Finally, we derive the latent action  $a_t \in \mathbf{R}^{N \times D}$  where  $D$  is the dimension of each code. We refer  $a_t$  as the latent action embedding, or sub-task embedding, as they describe the information that takes the observation  $o_t$  to the next observation  $o_{t+1}$ .

For the FDM  $F$ , we propose using a single-frame Vision Transformer to reconstruct  $o_{t+1}$ , in contrast to previous works (Schmidt & Jiang, 2023; Bruce et al., 2024), which reconstruct the next frame given the entire context  $o_{1:t}$ . This approach mitigates the case where the model might predict the next frame directly from the context, bypassing the latent action. By conditioning on a single frame, it encourages more information to flow into the latent action  $a_t$ . For reconstruction, we apply another random cropping  $c_2$ , and the next frame is predicted as  $o_{t+1}^{\hat{}} = F(c_2[o_t], a_t)$ . By using different croppings  $c_1$  and  $c_2$ , the model is encouraged to learn a more semantically invariant latent action across different trajectories. The models are trained jointly with the reconstruction loss  $\|c_2[o_{t+1}] - o_{t+1}^{\hat{}}\|^2$  and the commitment loss in vector quantization.

## 2.2 FOUNDATION WORLD MODEL

Our foundation world model is a continuous-time Rectified Flow (Liu et al., 2023; Esser et al., 2024) that learns to predict the future frames  $o_{t+1:T}$  conditioned on the history observation frame  $o_{1:t}$ , and future latent actions  $a_{t:T-1}$ . To achieve this goal, there are two key challenges: 1) Generating the photo-realistic frame that describes the states precisely; 2) Controlling the generated frames by the latent actions.

Accordingly, we start our foundation world model with the pre-trained Open-Sora (Zheng et al., 2024). It consists of two components: a 3D Variational AutoEncoder (VAE) that encodes the raw observation into latent space with  $8 \times 8$  times downsampling in spatial dimension and  $4 \times$  times downsampling in temporal dimension; a Spatial-Temporal Rectified Flow Transformer (ST-RFT) that generates the latent from the text conditions. To enable the control from the observation and action, we make two modifications to the original Open-Sora: 1) We replace the original text input of the pre-trained model with our latent actions  $a_{1:T}$  obtained from LAM. Zero-padding is applied for the last action. For each frame, we map the latent actions into a single token and feed it to the ST-RFT via the cross-attention mechanism; 2) We also make the generation conditioned on the output of FDM  $\hat{o}_{2:T}$ , which provides a coarse-grained prediction according to the input latent action. For the conditioning of  $\hat{o}_{2:T}$ , we encode it to the latent space with the same 3D VAE and directly add it to the noisy input element-wise.

Formally, Rectified Flow (Liu et al., 2023; Albergo & Vanden-Eijnden, 2023; Esser et al., 2024) aims at directly regressing a vector field that generates a probability path between noise distribution and data distribution. For  $n \in [0, 1]$ , we define the interpolation between the two distributions as:

$$x_n = (1 - n)x_0 + nx_1, \quad (1)$$

where  $x_0$  is the clean data,  $x_1$  is the sampled noise, and  $x_n$  is the noisy data. During training, we train a vector-valued neural network  $\mathbf{x}_\theta$  with L2 loss:

$$\mathbb{E}_{n, x_0, x_1} \|\mathbf{x}_0 - \mathbf{x}_\theta(x_n, n, a_{1:T}, \hat{o}_{2:T})\|^2. \quad (2)$$

Instead of predicting the conditional expectation directly, we follow Liu et al. (2023) to parameterize the velocity with a neural network  $\mathbf{v}_\theta$  and train it on:

$$L_{\text{world}}(\theta) = \mathbb{E}_{n, x_0, x_1} \|(\mathbf{x}_1 - \mathbf{x}_0) - \mathbf{v}_\theta(x_n, n, a_{1:T}, \hat{o}_{2:T})\|^2. \quad (3)$$



It should be noted that, our foundation world model can be fine-tuned to accommodate the different action spaces of robots with various embodiments. The fine-tuning of the foundational world model is left as future work.

### 2.3 FOUNDATION POLICY MODEL AND LOW-LEVEL POLICY MODEL

The training of the policy model consists of two stages. On the first pretraining stage, taken as input the raw observation frames  $o_{1:t}$ , the foundation policy model predicts latent actions  $a_t = I([o_{1:t+1}])$  labeled by the IDM in the latent action model at each step. The training dataset of this stage is the same as that used for latent action model, i.e., with large-scale and diverse sources of videos. On the second finetuning stage, we add an extra prediction component on the foundation policy model to predict real continuous robot actions, with taking the raw observations as well as the latent actions predicted by the first stage model as input. In this stage, only the prediction component (i.e., the low-level policy model) is optimized on small-scale and task-specific downstream datasets, while other components are frozen.

Specifically, similar to the latent action model, the backbone of foundation policy model is also a ST-transformer equipped with a ViT image encoder, with a feed-forward layer as the final prediction layer. We use the L2 distance between the predicted hidden output and the latent action as the loss function. Given a trajectory consists of  $t$  observations  $o_{1:t}$ , the training objective can be written as:

$$L_{policy} = \|P(o_{1:t}) - a_t\|^2, \quad (4)$$

where  $P(\cdot)$  denotes the policy model.

On the second stage, we train the low-level policy model to predict the real continuous actions within each latent action, where the image-goal latent actions can be seen representations for sub-tasks defined by reaching a goal from an initial image. The low-level policy model is also an ST-transformer with a prediction layer. The input consists of the patch-level observation representations and latent actions predicted by the foundation policy model, which is concatenated together at the patch level as one part. The latent action predicted by the foundation policy model also serves as sub-task embedding for the low-level policy model. We denote that each latent action corresponds to  $\tau$  real robot actions, and the latent action  $a_t$  corresponds to real robot action  $u_t^{1:\tau}$ . Denote the low-level policy model as  $P_f(\cdot)$ , we train the second stage model also by L2 distance:

$$L_{ft} = \|P_f([P(o_{1:t}), z_{1:t}]) - u_t^{1:\tau}\|^2, \quad (5)$$

where only the parameters of the low-level policy is optimized.

## 3 EXPERIMENTS

### 3.1 DATASET

In the pretraining stage, we construct a large-scale dataset comprising diverse domains, including robotic data from various embodiments and a substantial amount of human activity videos.

**Data Mixture.** For the robotic data, we select a subset of Open-X Embodiment dataset (Collaboration et al., 2023) with single arm end-effector control, excluding the RT-1 dataset for out-of-distribution (OOD) evaluation. We follow the preprocessing and data mixture weights from Team et al. (2024); Kim et al. (2024). In total, we utilize approximately 0.8M robot trajectories. While our dataset includes data from real robots, we discard the associated actions and proprio-states, using only image frames and text instructions during pretraining. Additionally, we incorporate large-scale open-world videos with language instructions, including human daily activities from Something-Something v2 (Goyal et al., 2017), and egocentric videos such as EGTEA (Li et al., 2018), Epic Kitchen (Damen et al., 2020), and Ego4D (Grauman et al., 2022; Pramanick et al., 2023). In total, we derive approximately 2.0M human activity video clips with high quality. Overall, our dataset for pretraining comprises around 2.8M trajectories and video clips, where each trajectory contains a language instruction  $i$  and a sequence of observations  $\{o_j\}_{j=0}^T$ .

**Data Preprocessing.** In practice, we found that the video quality has a big impact on the model performance. We exclude low-quality videos characterized by excessive shakiness or rapid camera

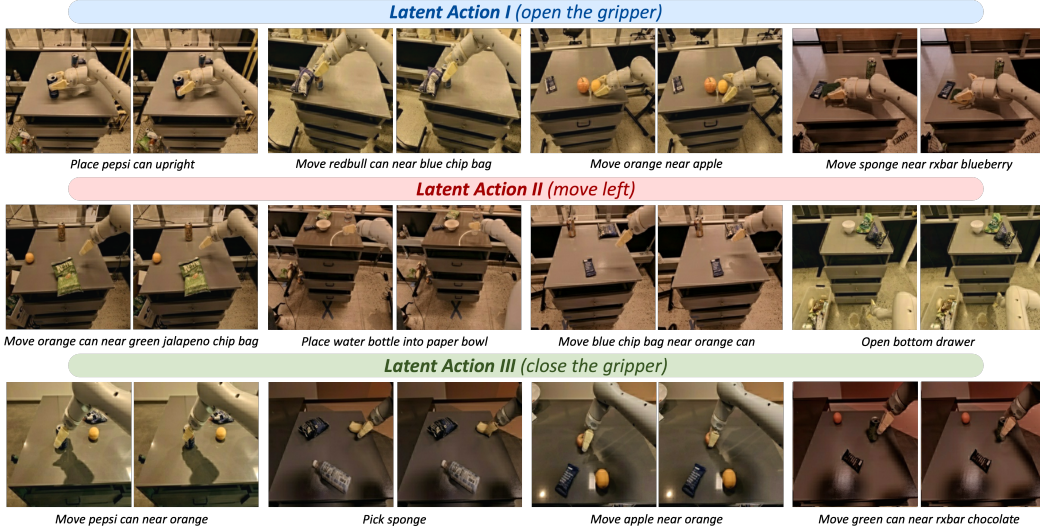

Figure 3: Image-goal pairs with similar latent actions in OOD RT-1 dataset. In each row, we choose the leftmost image-goal pair, and retrieve 3 nearest pairs on latent action embedding. The original task instruction of the pairs are shown under the images. We find that each row shares the similar visual changes semantically, and the latent actions generalize across different raw language tasks.

movement, and apply stabilization techniques to the remaining videos. To ensure proper amount of changes between frames in the latent action model, we choose the optimal frame rates for robotics dataset and human activity videos.

In the finetuning stage, we use the RT-1 dataset, a large-scale dataset for real-world robotic experiences. We uniformly sample 1% number of episodes from RT-1 dataset for finetuning, where each episode comprises of a language instruction  $i$ , a sequence of image observations  $\{o_j\}_{j=0}^T$ , and a sequence of low-level actions  $\{u_j\}_{j=0}^T$ . The action space is 7-dimensional, including 3 dimensions of robot arm movement  $\Delta Pos$ , 3 dimensions of robot arm rotation  $\Delta Rot$ , and 1 dimension of robot gripper action  $\Delta Grp$ . We provide more details in Appendix A.

### 3.2 TRAINING DETAILS

We first pretrain our latent action model on our pretraining dataset. Then, we use the pretrained latent action model to label latent actions on our pretraining dataset, and pretrain foundation policy model and foundation world model on the labeled dataset. Finally, we finetune our low-level policy model on top of our pretrained models on RT-1.

For latent action model, we use a codebook with  $N = 4$  tokens, and codebook size of  $|C| = 32$ , each with an embedding size of  $D = 128$ . We use a sub-task length of  $\tau = 3$  for finetuning the low-level policy model on RT-1 dataset. Please refer to Appendix B for more training details.

### 3.3 QUALITATIVE RESULTS ON LATENT ACTIONS

We present qualitative results on latent actions learned from robotics and human activity dataset. Specifically, we answer the following questions on learned latent actions:

- Does the similar latent actions reflect similar visual changes?
- Can latent actions encode semantically consistent changes across different tasks, and embodiments including human and robots? If so, are we able to migrate movements in videos across embodiments and tasks via latent action?
- Does learned policy foundation model properly follow language instructions for task solving?

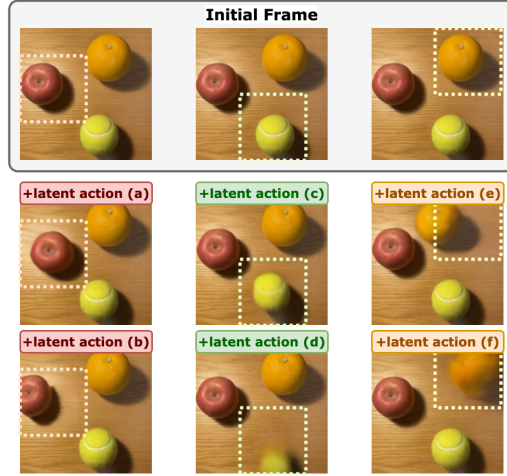

Figure 4: Controllability of latent action among multiple objects. The last two rows show the generated image by applying 6 different latent actions to the initial frame. Effects of applying different latent actions are highlighted in dashed square: (a,b) move the apple, (c,d) move the tennis, (e,f) move the orange. Full generated videos from the world model are available on our [webpage](#).

### 3.3.1 VISUALIZATION OF IMAGE-GOAL PAIRS WITH SIMILAR LATENT ACTIONS

We investigate whether similar learned latent actions reflect similar visual changes on robotics manipulation dataset. We use the RT-1 dataset, which was excluded from the latent action model training and serves as out-of-domain samples for evaluation. We randomly select image-goal pairs from the RT-1 dataset, and present the image-goal pairs with smallest euclidean distance in latent action embedding in the RT-1 dataset in Figure 3. We observe that pairs with similar embeddings indeed have similar visual changes, and also similar sub-tasks in semantic, for example, “open the gripper”, “move left”, and “close the gripper”. Furthermore, each sub-task appears in different raw language tasks, suggesting the latent actions are reused, thereby facilitating generalization in model learning.

### 3.3.2 CONTROLLABILITY OF LATENT ACTIONS

We demonstrate that latent actions are able to control the changes in objects on different real world scenes, and the effects of latent actions generalize across tasks and embodiments. Specially, the generalizability of latent actions enable IGOR to successfully migrate human movement videos into robot movements provided the initial image, despite they largely differ in embodiments.

**Object Controllability Among Multiple Objects.** We evaluate the controllability of the latent actions on object movements among multiple objects on the same image. In Figure 4, we generate subsequent images by applying 6 different actions to the same original image on the foundation world model. We observe that latent action model and the foundation world model learn to control specific object’s movement among multiple objects.

**Object Controllability Across Embodiments and Tasks.** We evaluate the semantic consistency of the latent actions across different setups, including embodiments and tasks. We use pairs of image-goal in the real world manipulation videos to generate latent actions, and apply the same set of actions to other images in different scene setups with foundation world model to generate subsequent videos. The results are shown in Figure 2. Impressively, we observe that (1) latent actions are semantically consistent across different tasks with different object categories, and (2) latent actions are semantically consistent across human and robot. By applying latent actions extracted from human demonstrations, we generate videos of robot arm movements. With only one demonstration, the robot arm can successfully migrate the human behavior, which opens up new possibilities for few-shot human-to-robot transfer and control.

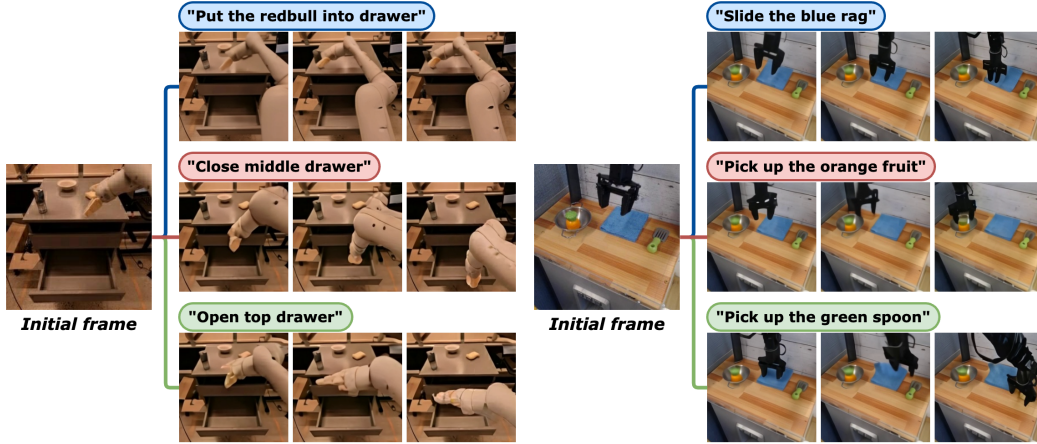

Figure 5: Generated image sequence jointly by the foundation policy and world model via only latent actions, following 3 different instructions from the same initial image. Full generated videos from the world model are available on our [webpage](#).

### 3.3.3 COUNTERFACTUAL VIDEO GENERATION WITH DIVERSE INSTRUCTIONS

We analyze whether the foundation policy model has the ability to follow human instructions. To this end, we interpret what the latent action did visually with the foundation world model. Starting from a single initial image, the foundation policy and world model can jointly generate diverse behaviors in videos that follow diverse instructions using only latent actions. We experiment with initial image from RT-1 and Bridge dataset and manually written instructions, and show the image clips of generated videos in Figure 5. The results show that the foundation policy model can properly follow different language instructions for task solving.

## 3.4 QUANTITATIVE RESULTS

### 3.4.1 EVALUATION ON THE GOOGLE ROBOT TASKS IN SIMPLER

We evaluate our IGOR-based training framework on the Google robot tasks in the SIMPLER simulator under a low-data regime, utilizing only 1% of the data from the large RT-1 dataset for the low-level policy learning stage.

**Evaluation Setups.** We test different model ability to control the Google Robot following language tasks with RGB images as observations, where all robots are controlled with low-level end-effector control actions, after finetuning on the same amount of data from RT-1 dataset. We evaluate the success rate on three tasks: “Pick Coke Can”, “Move Near”, and “Open / Close Drawer”.

**Baseline Method.** We compare with the same low-level policy model architecture with ST-Transformer, without latent action embedding concatenated on the observation feature embedding.

We present the success rate of different methods in Figure 6(a). From the figure, we observe that IGOR achieves the higher or equal success rate than the model trained from scratch, showing the generalizability of the learned latent action to real robotics actions.

### 3.4.2 PREDICTIVENESS OF LATENT ACTIONS ON ROBOT ACTIONS

We analyze the whether our learned latent actions are predictive of real robot actions. On RT-1 dataset, we randomly sample a number of  $M = 15,000$  pairs of images, and compute their latent action embeddings. For each pair of image, we find  $N$  nearest neighbours of image pairs in RT-1 dataset in latent action embedding, and compute the standard derivation of real robot actions among  $N$  neighbours on each action dimension, normalized by the standard derivation of robot actions over each dimension over the whole RT-1 dataset. Finally, we compute the averaged normalized standard



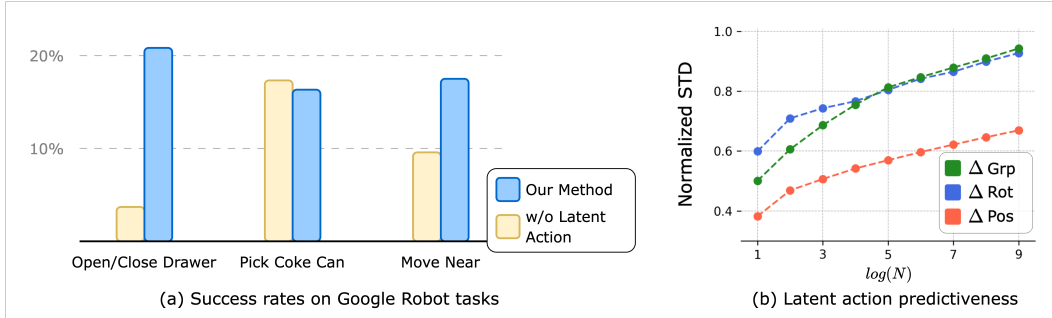

Figure 6: (a). Success rate of IGOR and the low-level policy trained from scratch methods on Google Robot tasks under SIMPLER simulator, finetuned on 1% data of RT-1. (b). Predictiveness of latent action on robot action. X-axis:  $\log(N)$ , where  $N$  is the number of nearest neighbours in latent action embedding. Y-axis: normalized standard deviation in action embedding with respect to movement actions (orange), rotation actions (blue), and gripper actions (green).

derivation across  $M = 15,000$  images. The smaller standard derivation reflects that fact that latent actions are more predictive of real robot actions.

The results are shown in Figure 6(b). The fact that all normalized standard derivation is less than 1.0 shows that the latent actions are predictive of real robot actions including robot movements, rotations and gripper actions. It is also shown that the latent actions are more predictive of the robot movement than rotations and gripper actions, suggesting that the IGOR learned action space reflects more information in robot movements than robot arm rotations and gripping.

### 3.5 ABLATION STUDIES

We provide additional ablation studies on the pretraining dataset and the design choice of latent action model, showing that using a mixture of robotics and human activity dataset benefits the generalization of latent action model. Detailed ablation studies results are provided in Appendix C.

## 4 RELATED WORK

**Foundation Agents for Robots** Open-ended task-agnostic training and high-capacity neural network architectures have been recognized as key to the success of foundation models. In this context, a series of generalist agents have been proposed as the foundation policy models for robots (Brohan et al., 2022; Bousmalis et al., 2023; Brohan et al., 2023; Team et al., 2024; Kim et al., 2024). RT-1 (Brohan et al., 2022) contributes a large-scale multi-task dataset and a robotic transformer architecture, facilitating and assessing generalization across multiple tasks. RoboCat builds on Gato (Reed et al., 2022), further enabling multi-embodiment generalization. RT-2 highlights the importance of leveraging vision-language models trained on internet-scale data (Brohan et al., 2023). Octo (Team et al., 2024) and OpenVLA (Kim et al., 2024) can be seen as open versions of RoboCat and RT-2 respectively, with some additional technical contributions. IGOR is similar to RT-2 and OpenVLA in the sense that we both leverage Internet-scale data. The difference lies in that we use video data (with text labels) of human/robot performing embodied AI tasks, while they use text data and visual question answering data for the training of vision language model. To the best of our knowledge, we present the first foundation policy model that perform decision making in the sub-task (i.e. latent action) level.

**Image-Goal Visual Changes** Tracking visual changes and establishing correspondence between an image and its goal state is crucial for dynamic visual understanding in embodied AI. SiamMAE (Gupta et al., 2023) proposes use a siamese encoder on the image and goal to learn visual correspondence. Voltron (Karamcheti et al., 2023) introduces language-guided visual representation learning on image-goal pairs. FLOWRETRIEVAL (Lin et al., 2024) and AVDC (Ko et al., 2023) leverage optical flow between image and goal to capture visual changes and correspondence, while Video-LaVIT (Jin et al., 2024) utilizes motion vectors. iVideoGPT (Wu et al., 2024) proposes us-

ing image-conditioned goal representations as state representations to predict within a world model. VPT (Baker et al., 2022) proposes to recover latent actions in videos using an inverse dynamics model trained on interaction data to predict real actions. Perhaps the most similar approaches to our methods are LAPO (Schmidt & Jiang, 2023) and Genie (Bruce et al., 2024). Both works primarily focus on 2D platformer games where each latent action corresponds to a specific control button. By contrast, we aim to develop a more generalizable model to handle the significantly greater complexity of open-world scenarios, where latent actions may not correspond to any specific underlying actions.

**Video Generation for Embodied AI** Video generation is another research topic closely related to embodied AI. It has been proposed that video can be seen as the new language for real-world decision making (Yang et al., 2024b). Many works on world models build on video generation techniques (Bruce et al., 2024; Wu et al., 2024; Hu et al., 2023; Yang et al., 2024a; Xiang et al., 2024). Some text-to-video works claim to be real-world simulators, such as Sora (Brooks et al., 2024) and WorldDreamer (Wang et al., 2024). Unipi (Du et al., 2023) proposes to first predict next goal state, then infer real robot actions with an inverse dynamics model. By contrast, our foundation policy model first predict the latent action, which can specify the goal state, and then use the latent action to enable sub-task level generalization. We argue that forward prediction in latent action space, rather than the original image space, offers several advantages. For example, we can perform sub-task understanding for image-goal representations, and the compressed latent action could be easier to predict than the entire image.

**Pre-trained Visual Representations** Pre-trained Visual Representations target on training representations for images/videos in self-supervised learning manner (He et al., 2021; Xiao et al., 2022; Radosavovic et al., 2022; Majumdar et al., 2023; Radford et al., 2021; Nair et al., 2022; Ma et al., 2023; Oquab et al., 2023; Darcet et al., 2023; Kirillov et al., 2023; Assran et al., 2023; Bardes et al., 2024), and has been demonstrated to be very effective for state understanding in embodied AI. By contrast, IGOR learns image-goal representations for sub-task understanding, which we believe are another crucial building blocks, that may significantly enhance generalization in embodied AI.

## 5 CONCLUSIONS, LIMITATIONS, AND FUTURE WORK

In this paper, we propose IGOR, a novel training framework, taking the first step towards learning a unified action space for humans and robots in various embodied AI tasks.

Qualitatively, we demonstrate that:

- IGOR learns similar representations for image pairs with similar visual changes.
- The learned latent action has control over the next state given the current image.
- The foundation world model acquires knowledge about objects and their potential movements.
- The foundation policy model learns to follow instructions across different states.

Quantitatively, we show that:

- On RT-1 dataset, image-goal pairs with similar latent actions have similar low-level robot actions.
- The IGOR framework improves policy learning, potentially due to its capability to predict the next sub-task by leveraging internet-scale data, thereby enabling sub-task level generalization.

The IGOR framework is limited in the following perspective: we cannot separate visual changes caused by the agents, other agents (such as dogs), or the shakiness of camera. To address this, we mitigated camera shakiness and used only ego-centric videos without other agents in view. Just like any other representation learning methods, scaling up the dataset and model size is always most straightforward and effective. To facilitate the usage of more data, incorporating image processing methods such as object segmentation with IGOR will be part of future works. For better applications in embodied AI, the foundation world model can also be tuned to match real world scenarios, along with other improvements such as adapting the latent action model for multi-agent scenarios.

## REFERENCES

- Michael Samuel Albergo and Eric Vanden-Eijnden. Building normalizing flows with stochastic interpolants. In *International Conference on Learning Representations*, 2023.
- Mahmoud Assran, Quentin Duval, Ishan Misra, Piotr Bojanowski, Pascal Vincent, Michael Rabbat, Yann LeCun, and Nicolas Ballas. Self-supervised learning from images with a joint-embedding predictive architecture, 2023. URL <https://arxiv.org/abs/2301.08243>.
- Bowen Baker, Ilge Akkaya, Peter Zhokhov, Joost Huizinga, Jie Tang, Adrien Ecoffet, Brandon Houghton, Raul Sampedro, and Jeff Clune. Video pretraining (vpt): Learning to act by watching unlabeled online videos, 2022. URL <https://arxiv.org/abs/2206.11795>.
- Adrien Bardes, Quentin Garrido, Jean Ponce, Xinlei Chen, Michael Rabbat, Yann LeCun, Mahmoud Assran, and Nicolas Ballas. Revisiting feature prediction for learning visual representations from video, 2024. URL <https://arxiv.org/abs/2404.08471>.
- Konstantinos Bousmalis, Giulia Vezzani, Dushyant Rao, Coline Devin, Alex X. Lee, Maria Bauza, Todor Davchev, Yuxiang Zhou, Agrim Gupta, Akhil Raju, Antoine Laurens, Claudio Fantacci, Valentin Dalibard, Martina Zambelli, Murilo Martins, Rugile Pevceviciute, Michiel Blokzijl, Misha Denil, Nathan Batchelor, Thomas Lampe, Emilio Parisotto, Konrad Żołna, Scott Reed, Sergio Gómez Colmenarejo, Jon Scholz, Abbas Abdolmaleki, Oliver Groth, Jean-Baptiste Regli, Oleg Sushkov, Tom Rothörl, José Enrique Chen, Yusuf Aytar, Dave Barker, Joy Ortiz, Martin Riedmiller, Jost Tobias Springenberg, Raia Hadsell, Francesco Nori, and Nicolas Heess. Robocat: A self-improving generalist agent for robotic manipulation, 2023. URL <https://arxiv.org/abs/2306.11706>.
- Anthony Brohan, Noah Brown, Justice Carbajal, Yevgen Chebotar, Joseph Dabis, Chelsea Finn, Keerthana Gopalakrishnan, Karol Hausman, Alex Herzog, Jasmine Hsu, et al. Rt-1: Robotics transformer for real-world control at scale. *arXiv preprint arXiv:2212.06817*, 2022.
- Anthony Brohan, Noah Brown, Justice Carbajal, Yevgen Chebotar, Xi Chen, Krzysztof Choroński, Tianli Ding, Danny Driess, Avinava Dubey, Chelsea Finn, Pete Florence, Chuyuan Fu, Montse Gonzalez Arenas, Keerthana Gopalakrishnan, Kehang Han, Karol Hausman, Alex Herzog, Jasmine Hsu, Brian Ichter, Alex Irpan, Nikhil Joshi, Ryan Julian, Dmitry Kalashnikov, Yuheng Kuang, Isabel Leal, Lisa Lee, Tsang-Wei Edward Lee, Sergey Levine, Yao Lu, Henryk Michalewski, Igor Mordatch, Karl Pertsch, Kanishka Rao, Krista Reymann, Michael Ryoo, Grecia Salazar, Pannag Sanketi, Pierre Sermanet, Jaspier Singh, Anikait Singh, Radu Soricut, Huang Tran, Vincent Vanhoucke, Quan Vuong, Ayzaan Wahid, Stefan Welker, Paul Wohlhart, Jialin Wu, Fei Xia, Ted Xiao, Peng Xu, Sichun Xu, Tianhe Yu, and Brianna Zitkovich. Rt-2: Vision-language-action models transfer web knowledge to robotic control. In *arXiv preprint arXiv:2307.15818*, 2023.
- Tim Brooks, Bill Peebles, Connor Holmes, Will DePue, Yufei Guo, Li Jing, David Schnurr, Joe Taylor, Troy Luhman, Eric Luhman, Clarence Ng, Ricky Wang, and Aditya Ramesh. Video generation models as world simulators. 2024. URL <https://openai.com/research/video-generation-models-as-world-simulators>.
- Jake Bruce, Michael D Dennis, Ashley Edwards, Jack Parker-Holder, Yuge Shi, Edward Hughes, Matthew Lai, Aditi Mavalankar, Richie Steigerwald, Chris Apps, et al. Genie: Generative interactive environments. In *Forty-first International Conference on Machine Learning*, 2024.
- Open X-Embodiment Collaboration, Abby O’Neill, Abdul Rehman, Abhiram Maddukuri, Abhishek Gupta, Abhishek Padalkar, Abraham Lee, Acorn Pooley, Agrim Gupta, Ajay Mandlekar, Ajinkya Jain, Albert Tung, Alex Bewley, Alex Herzog, Alex Irpan, Alexander Khazatsky, Anant Rai, Anchit Gupta, Andrew Wang, Andrey Kolobov, Anikait Singh, Animesh Garg, Aniruddha Kembhavi, Annie Xie, Anthony Brohan, Antonin Raffin, Archit Sharma, Arefeh Yavary, Arhan Jain, Ashwin Balakrishna, Ayzaan Wahid, Ben Burgess-Limerick, Beomjoon Kim, Bernhard Schölkopf, Blake Wulfe, Brian Ichter, Cewu Lu, Charles Xu, Charlotte Le, Chelsea Finn, Chen Wang, Chenfeng Xu, Cheng Chi, Chenguang Huang, Christine Chan, Christopher Agia, Chuer Pan, Chuyuan Fu, Coline Devin, Danfei Xu, Daniel Morton, Danny Driess, Daphne Chen, Deepak

- Pathak, Dhruv Shah, Dieter B  chler, Dinesh Jayaraman, Dmitry Kalashnikov, Dorsa Sadigh, Edward Johns, Ethan Foster, Fangchen Liu, Federico Ceola, Fei Xia, Feiyu Zhao, Felipe Vieira Fr  jeri, Freek Stulp, Gaoyue Zhou, Gaurav S. Sukhatme, Gautam Salhotra, Ge Yan, Gilbert Feng, Giulio Schiavi, Glen Berseth, Gregory Kahn, Guangwen Yang, Guanzhi Wang, Hao Su, Hao-Shu Fang, Haochen Shi, Henghui Bao, Heni Ben Amor, Henrik I Christensen, Hiroki Furuta, Homer Walke, Hongjie Fang, Huy Ha, Igor Mordatch, Ilija Radosavovic, Isabel Leal, Jacky Liang, Jad Abou-Chakra, Jaehyung Kim, Jaimyn Drake, Jan Peters, Jan Schneider, Jasmine Hsu, Jeannette Bohg, Jeffrey Bingham, Jeffrey Wu, Jensen Gao, Jiaheng Hu, Jiajun Wu, Jialin Wu, Jiankai Sun, Jianlan Luo, Jiayuan Gu, Jie Tan, Jihoon Oh, Jimmy Wu, Jingpei Lu, Jingyun Yang, Jitendra Malik, Jo  o Silv  rio, Joey Hejna, Jonathan Booyer, Jonathan Tompson, Jonathan Yang, Jordi Salvador, Joseph J. Lim, Junhyek Han, Kaiyuan Wang, Kanishka Rao, Karl Pertsch, Karol Hausman, Keegan Go, Keerthana Gopalakrishnan, Ken Goldberg, Kendra Byrne, Kenneth Oslund, Kento Kawaharazuka, Kevin Black, Kevin Lin, Kevin Zhang, Kiana Ehsani, Kiran Lekkala, Kirsty Ellis, Krishan Rana, Krishnan Srinivasan, Kuan Fang, Kunal Pratap Singh, Kuo-Hao Zeng, Kyle Hatch, Kyle Hsu, Laurent Itti, Lawrence Yunliang Chen, Lerrel Pinto, Li Fei-Fei, Liam Tan, Linxi "Jim" Fan, Lionel Ott, Lisa Lee, Luca Weihs, Magnum Chen, Marion Lepert, Marius M  mmel, Masayoshi Tomizuka, Masha Itkina, Mateo Guaman Castro, Max Spero, Maximilian Du, Michael Ahn, Michael C. Yip, Mingtong Zhang, Mingyu Ding, Minh  o Heo, Mohan Kumar Srirama, Mohit Sharma, Moo Jin Kim, Naoaki Kanazawa, Nicklas Hansen, Nicolas Heess, Nikhil J Joshi, Niko Suenderhauf, Ning Liu, Norman Di Palo, Nur Muhammad Mahi Shafiullah, Oier Mees, Oliver Kroemer, Osbert Bastani, Pannag R Sanketi, Patrick "Tree" Miller, Patrick Yin, Paul Wohlhart, Peng Xu, Peter David Fagan, Peter Mitrano, Pierre Sermanet, Pieter Abbeel, Priya Sundareshan, Qiuyu Chen, Quan Vuong, Rafael Rafailov, Ran Tian, Ria Doshi, Roberto Mart  n-Mart  n, Rohan Baijal, Rosario Scalise, Rose Hendrix, Roy Lin, Runjia Qian, Ruohan Zhang, Russell Mendonca, Rutav Shah, Ryan Hoque, Ryan Julian, Samuel Bustamante, Sean Kirmani, Sergey Levine, Shan Lin, Sherry Moore, Shikhar Bahl, Shivin Dass, Shubham Sonawani, Shuran Song, Sichun Xu, Siddhant Haldar, Siddharth Karamcheti, Simeon Adebola, Simon Guist, Soroush Nasiriany, Stefan Schaal, Stefan Welker, Stephen Tian, Subramanian Ramamoorthy, Sudeep Dasari, Suneel Belkhale, Sungjae Park, Suraj Nair, Suvir Mirchandani, Takayuki Osa, Tanmay Gupta, Tatsuya Harada, Tatsuya Matsushima, Ted Xiao, Thomas Kollar, Tianhe Yu, Tianli Ding, Todor Davchev, Tony Z. Zhao, Travis Armstrong, Trevor Darrell, Trinity Chung, Vidhi Jain, Vincent Vanhoucke, Wei Zhan, Wenxuan Zhou, Wolfram Burgard, Xi Chen, Xiangyu Chen, Xiaolong Wang, Xinghao Zhu, Xinyang Geng, Xiyuan Liu, Xu Liangwei, Xuanlin Li, Yansong Pang, Yao Lu, Yecheng Jason Ma, Yejin Kim, Yevgen Chebotar, Yifan Zhou, Yifeng Zhu, Yilin Wu, Ying Xu, Yixuan Wang, Yonatan Bisk, Yongqiang Dou, Yoonyoung Cho, Youngwoon Lee, Yuchen Cui, Yue Cao, Yueh-Hua Wu, Yujin Tang, Yuke Zhu, Yunchu Zhang, Yunfan Jiang, Yunshuang Li, Yunzhu Li, Yusuke Iwasawa, Yutaka Matsuo, Zehan Ma, Zhuo Xu, Zichen Jeff Cui, Zichen Zhang, Zipeng Fu, and Zipeng Lin. Open X-Embodiment: Robotic learning datasets and RT-X models. <https://arxiv.org/abs/2310.08864>, 2023.
- Dima Damen, Hazel Doughty, Giovanni Maria Farinella, Sanja Fidler, Antonino Furnari, Evangelos Kazakos, Davide Moltisanti, Jonathan Munro, Toby Perrett, Will Price, et al. The epic-kitchens dataset: Collection, challenges and baselines. *IEEE Transactions on Pattern Analysis and Machine Intelligence*, 43(11):4125–4141, 2020.
- Timoth  e Darcet, Maxime Oquab, Julien Mairal, and Piotr Bojanowski. Vision transformers need registers, 2023.
- Alexey Dosovitskiy, Lucas Beyer, Alexander Kolesnikov, Dirk Weissenborn, Xiaohua Zhai, Thomas Unterthiner, Mostafa Dehghani, Matthias Minderer, Georg Heigold, Sylvain Gelly, Jakob Uszkoreit, and Neil Houlsby. An image is worth 16x16 words: Transformers for image recognition at scale, 2021. URL <https://arxiv.org/abs/2010.11929>.
- Yilun Du, Mengjiao Yang, Bo Dai, Hanjun Dai, Ofir Nachum, Joshua B. Tenenbaum, Dale Schuurmans, and Pieter Abbeel. Learning universal policies via text-guided video generation, 2023. URL <https://arxiv.org/abs/2302.00111>.
- Patrick Esser, Sumith Kulal, Andreas Blattmann, Rahim Entezari, Jonas M  ller, Harry Saini, Yam Levi, Dominik Lorenz, Axel Sauer, Frederic Boesel, et al. Scaling rectified flow transformers for high-resolution image synthesis. In *Forty-first International Conference on Machine Learning*, 2024.



- Raghav Goyal, Samira Ebrahimi Kahou, Vincent Michalski, Joanna Materzynska, Susanne Westphal, Heuna Kim, Valentin Haenel, Ingo Fruend, Peter Yianilos, Moritz Mueller-Freitag, et al. The” something something” video database for learning and evaluating visual common sense. In *Proceedings of the IEEE international conference on computer vision*, pp. 5842–5850, 2017.
- Kristen Grauman, Andrew Westbury, Eugene Byrne, Zachary Chavis, Antonino Furnari, Rohit Girdhar, Jackson Hamburger, Hao Jiang, Miao Liu, Xingyu Liu, et al. Ego4d: Around the world in 3,000 hours of egocentric video. In *Proceedings of the IEEE/CVF Conference on Computer Vision and Pattern Recognition*, pp. 18995–19012, 2022.
- Agrim Gupta, Jiajun Wu, Jia Deng, and Li Fei-Fei. Siamese masked autoencoders, 2023. URL <https://arxiv.org/abs/2305.14344>.
- Kaiming He, Xinlei Chen, Saining Xie, Yanghao Li, Piotr Dollár, and Ross Girshick. Masked autoencoders are scalable vision learners, 2021. URL <https://arxiv.org/abs/2111.06377>.
- Anthony Hu, Lloyd Russell, Hudson Yeo, Zak Murez, George Fedoseev, Alex Kendall, Jamie Shotton, and Gianluca Corrado. Gaia-1: A generative world model for autonomous driving, 2023. URL <https://arxiv.org/abs/2309.17080>.
- Yang Jin, Zhicheng Sun, Kun Xu, Kun Xu, Liwei Chen, Hao Jiang, Quzhe Huang, Chengru Song, Yuliang Liu, Di Zhang, Yang Song, Kun Gai, and Yadong Mu. Video-lavit: Unified video-language pre-training with decoupled visual-motional tokenization, 2024. URL <https://arxiv.org/abs/2402.03161>.
- Siddharth Karamcheti, Suraj Nair, Annie S. Chen, Thomas Kollar, Chelsea Finn, Dorsa Sadigh, and Percy Liang. Language-driven representation learning for robotics. In *Robotics: Science and Systems (RSS)*, 2023.
- Alexander Khazatsky, Karl Pertsch, Suraj Nair, Ashwin Balakrishna, Sudeep Dasari, Siddharth Karamcheti, Soroush Nasiriany, Mohan Kumar Srirama, Lawrence Yunliang Chen, Kirsty Ellis, Peter David Fagan, Joey Hejna, Masha Itkina, Marion Lepert, Yecheng Jason Ma, Patrick Tree Miller, Jimmy Wu, Suneel Belkhale, Shivin Dass, Huy Ha, Arhan Jain, Abraham Lee, Youngwoon Lee, Marius Memmel, Sungjae Park, Ilija Radosavovic, Kaiyuan Wang, Albert Zhan, Kevin Black, Cheng Chi, Kyle Beltran Hatch, Shan Lin, Jingpei Lu, Jean Mercat, Abdul Rehman, Pannag R Sanketi, Archit Sharma, Cody Simpson, Quan Vuong, Homer Rich Walke, Blake Wulfe, Ted Xiao, Jonathan Heewon Yang, Arefeh Yavary, Tony Z. Zhao, Christopher Agia, Rohan Bajjal, Mateo Guaman Castro, Daphne Chen, Qiuyu Chen, Trinity Chung, Jaimyn Drake, Ethan Paul Foster, Jensen Gao, David Antonio Herrera, Minh Heo, Kyle Hsu, Jiaheng Hu, Donovan Jackson, Charlotte Le, Yunshuang Li, Kevin Lin, Roy Lin, Zehan Ma, Abhiram Maddukuri, Suvir Mirchandani, Daniel Morton, Tony Nguyen, Abigail O’Neill, Rosario Scalise, Derick Seale, Victor Son, Stephen Tian, Emi Tran, Andrew E. Wang, Yilin Wu, Annie Xie, Jingyun Yang, Patrick Yin, Yunchu Zhang, Osbert Bastani, Glen Berseth, Jeannette Bohg, Ken Goldberg, Abhinav Gupta, Abhishek Gupta, Dinesh Jayaraman, Joseph J Lim, Jitendra Malik, Roberto Martín-Martín, Subramanian Ramamoorthy, Dorsa Sadigh, Shuran Song, Jiajun Wu, Michael C. Yip, Yuke Zhu, Thomas Kollar, Sergey Levine, and Chelsea Finn. Droid: A large-scale in-the-wild robot manipulation dataset. 2024.
- Moo Jin Kim, Karl Pertsch, Siddharth Karamcheti, Ted Xiao, Ashwin Balakrishna, Suraj Nair, Rafael Rafailov, Ethan Foster, Grace Lam, Pannag Sanketi, et al. Openvla: An open-source vision-language-action model. *arXiv preprint arXiv:2406.09246*, 2024.
- Alexander Kirillov, Eric Mintun, Nikhila Ravi, Hanzi Mao, Chloe Rolland, Laura Gustafson, Tete Xiao, Spencer Whitehead, Alexander C. Berg, Wan-Yen Lo, Piotr Dollár, and Ross Girshick. Segment anything, 2023. URL <https://arxiv.org/abs/2304.02643>.
- Po-Chen Ko, Jiayuan Mao, Yilun Du, Shao-Hua Sun, and Joshua B. Tenenbaum. Learning to act from actionless videos through dense correspondences, 2023. URL <https://arxiv.org/abs/2310.08576>.

- Xuanlin Li, Kyle Hsu, Jiayuan Gu, Karl Pertsch, Oier Mees, Homer Rich Walke, Chuyuan Fu, Ishikaa Lunawat, Isabel Sieh, Sean Kirmani, Sergey Levine, Jiajun Wu, Chelsea Finn, Hao Su, Quan Vuong, and Ted Xiao. Evaluating real-world robot manipulation policies in simulation. *arXiv preprint arXiv:2405.05941*, 2024.
- Yin Li, Miao Liu, and James M Rehg. In the eye of beholder: Joint learning of gaze and actions in first person video. In *Proceedings of the European conference on computer vision (ECCV)*, pp. 619–635, 2018.
- Li-Heng Lin, Yuchen Cui, Amber Xie, Tianyu Hua, and Dorsa Sadigh. Flowretrieval: Flow-guided data retrieval for few-shot imitation learning, 2024. URL <https://arxiv.org/abs/2408.16944>.
- Xingchao Liu, Chengyue Gong, and Qiang Liu. Flow straight and fast: Learning to generate and transfer data with rectified flow. In *International Conference on Learning Representations*, 2023.
- Yecheng Jason Ma, Shagun Sodhani, Dinesh Jayaraman, Osbert Bastani, Vikash Kumar, and Amy Zhang. Vip: Towards universal visual reward and representation via value-implicit pre-training, 2023. URL <https://arxiv.org/abs/2210.00030>.
- Arjun Majumdar, Karmesh Yadav, Sergio Arnaud, Yecheng Jason Ma, Claire Chen, Sneha Silwal, Aryan Jain, Vincent-Pierre Berges, Pieter Abbeel, Jitendra Malik, Dhruv Batra, Yixin Lin, Oleksandr Maksymets, Aravind Rajeswaran, and Franziska Meier. Where are we in the search for an artificial visual cortex for embodied intelligence? 2023.
- Suraj Nair, Aravind Rajeswaran, Vikash Kumar, Chelsea Finn, and Abhinav Gupta. R3m: A universal visual representation for robot manipulation, 2022. URL <https://arxiv.org/abs/2203.12601>.
- Maxime Oquab, Timothée Darcet, Theo Moutakanni, Huy V. Vo, Marc Szafraniec, Vasil Khalidov, Pierre Fernandez, Daniel Haziza, Francisco Massa, Alaaeldin El-Nouby, Russell Howes, Po-Yao Huang, Hu Xu, Vasu Sharma, Shang-Wen Li, Wojciech Galuba, Mike Rabbat, Mido Assran, Nicolas Ballas, Gabriel Synnaeve, Ishan Misra, Herve Jegou, Julien Mairal, Patrick Labatut, Armand Joulin, and Piotr Bojanowski. Dinov2: Learning robust visual features without supervision, 2023.
- Shraman Pramanick, Yale Song, Sayan Nag, Kevin Qinghong Lin, Hardik Shah, Mike Zheng Shou, Rama Chellappa, and Pengchuan Zhang. Egovlpv2: Egocentric video-language pre-training with fusion in the backbone. In *Proceedings of the IEEE/CVF International Conference on Computer Vision*, pp. 5285–5297, 2023.
- Alec Radford, Jong Wook Kim, Chris Hallacy, Aditya Ramesh, Gabriel Goh, Sandhini Agarwal, Girish Sastry, Amanda Askell, Pamela Mishkin, Jack Clark, Gretchen Krueger, and Ilya Sutskever. Learning transferable visual models from natural language supervision, 2021. URL <https://arxiv.org/abs/2103.00020>.
- Ilija Radosavovic, Tete Xiao, Stephen James, Pieter Abbeel, Jitendra Malik, and Trevor Darrell. Real-world robot learning with masked visual pre-training. *CoRL*, 2022.
- Scott Reed, Konrad Zolna, Emilio Parisotto, Sergio Gomez Colmenarejo, Alexander Novikov, Gabriel Barth-Maron, Mai Gimenez, Yury Sulsky, Jackie Kay, Jost Tobias Springenberg, Tom Eccles, Jake Bruce, Ali Razavi, Ashley Edwards, Nicolas Heess, Yutian Chen, Raia Hadsell, Oriol Vinyals, Mahyar Bordbar, and Nando de Freitas. A generalist agent, 2022. URL <https://arxiv.org/abs/2205.06175>.
- Dominik Schmidt and Minqi Jiang. Learning to act without actions. *arXiv preprint arXiv:2312.10812*, 2023.
- Octo Model Team, Dibya Ghosh, Homer Walke, Karl Pertsch, Kevin Black, Oier Mees, Sudeep Dasari, Joey Hejna, Tobias Kreiman, Charles Xu, et al. Octo: An open-source generalist robot policy. *arXiv preprint arXiv:2405.12213*, 2024.

- Xiaofeng Wang, Zheng Zhu, Guan Huang, Boyuan Wang, Xinze Chen, and Jiwen Lu. World-dreamer: Towards general world models for video generation via predicting masked tokens, 2024. URL <https://arxiv.org/abs/2401.09985>.
- Jialong Wu, Shaofeng Yin, Ningya Feng, Xu He, Dong Li, Jianye Hao, and Mingsheng Long. ivideopt: Interactive videopts are scalable world models. *arXiv preprint arXiv:2405.15223*, 2024.
- Jiannan Xiang, Guangyi Liu, Yi Gu, Qiyue Gao, Yuting Ning, Yuheng Zha, Zeyu Feng, Tianhua Tao, Shibo Hao, Yemin Shi, Zhengzhong Liu, Eric P. Xing, and Zhiting Hu. Pandora: Towards general world model with natural language actions and video states, 2024. URL <https://arxiv.org/abs/2406.09455>.
- Tete Xiao, Ilija Radosavovic, Trevor Darrell, and Jitendra Malik. Masked visual pre-training for motor control. *arXiv:2203.06173*, 2022.
- Mingxing Xu, Wenrui Dai, Chunmiao Liu, Xing Gao, Weiyao Lin, Guo-Jun Qi, and Hongkai Xiong. Spatial-temporal transformer networks for traffic flow forecasting, 2021. URL <https://arxiv.org/abs/2001.02908>.
- Mengjiao Yang, Yilun Du, Kamyar Ghasemipour, Jonathan Tompson, Leslie Kaelbling, Dale Schuurmans, and Pieter Abbeel. Learning interactive real-world simulators, 2024a. URL <https://arxiv.org/abs/2310.06114>.
- Sherry Yang, Jacob Walker, Jack Parker-Holder, Yilun Du, Jake Bruce, Andre Barreto, Pieter Abbeel, and Dale Schuurmans. Video as the new language for real-world decision making, 2024b.
- Zangwei Zheng, Xiangyu Peng, Tianji Yang, Chenhui Shen, Shenggui Li, Hongxin Liu, Yukun Zhou, Tianyi Li, and Yang You. Open-sora: Democratizing efficient video production for all, March 2024. URL <https://github.com/hpcaitech/Open-Sora>.

## A DATASET

We present the datasets used for pre-training in Table 1. In total, these datasets comprise approximately 0.8 million robot trajectories and 2.0 million filtered human activity video clips. The robot data ratios are from (Team et al., 2024).

| Robot Dataset               | Mix Ratio (%) |
|-----------------------------|---------------|
| Kuka                        | 7.72          |
| Bridge                      | 8.08          |
| Taco Play                   | 1.82          |
| Jaco Play                   | 0.24          |
| Berkeley Cable Routing      | 0.12          |
| Roboturk                    | 1.40          |
| Viola                       | 0.55          |
| Berkely Autolab UR5         | 0.73          |
| Toto                        | 1.21          |
| Language Table              | 2.67          |
| Stanford Hydra Dataset      | 2.67          |
| Austin Buds Dataset         | 0.12          |
| NYU Franka Play Dataset     | 0.49          |
| Furniture Bench Dataset     | 1.46          |
| UCSD Kitchen Dataset        | 0.06          |
| Austin Sailor Dataset       | 1.34          |
| Austin Sirius Dataset       | 1.03          |
| DLR EDAN Shared Control     | 0.06          |
| IAMLab CMU Pickup Insert    | 0.55          |
| UTAustin Mutex              | 1.34          |
| Berkeley Fanuc Manipulation | 0.43          |
| CMU Stretch                 | 0.12          |
| BC-Z                        | 4.56          |
| FMB Dataset                 | 4.31          |
| DobbE                       | 0.85          |
| DROID                       | 6.07          |
| Ego4D                       | 32.1          |
| Something-Something V2      | 9.5           |
| EPIC-KITCHENS               | 8.0           |
| EGTEA Gaze+                 | 0.4           |

Table 1: Dataset, mixture weights, and number of training examples after filtering in the pre-training stage in IGOR.

**Data Filtering** We observed that video quality significantly affects the action model, particularly for human activities video. Excessive shakiness in videos can introduce visual changes between consecutive frames that are unrelated to the agent’s actions.

We calculate the camera motion over the videos, and filter approximately 40% percent of open-world video data. For the remaining data, we further stabilize the videos. Although we retain only 60% percent of open-world video data, we find that the action model improves dramatically.

**Frame Interval** A noticeable amount of visual changes is crucial for our latent action model. If we select two frames that are too close in time, the agent may barely move, resulting in visual changes that are not significant enough for inferring meaningful actions. Conversely, if the frames are too far apart, the changes might be too large to model accurately. To address this issue, we tune the sampling interval. For robot data, we choose frames that are three intervals apart, using  $s_t$  and  $s_{t+3}$  as the image-goal pair. For real world videos, we control the sampling. For real world data, we control the sample interval to be within  $[0.1s, 0.5s]$ . For the action and policy model, the context frames follow the same interval, ensuring that each pair of consecutive frames maintains this consistent spacing.



## B TRAINING DETAILS

### B.1 LATENT ACTION MODEL TRAINING

The latent action model uses an ST-transformer equipped with a frozen DINO-v2 pretrained ViT image encoder. The latent action model uses 258 M parameters, a patch size of 14, and a codebook with  $N = 4$  tokens and size  $|C| = 32$ , each with an embedding size of  $D = 128$ . We train the latent action model with batch size  $B = 512$ , training iterations of 140K steps, and learning rate of  $1.5e - 4$  with Adam optimizer.

### B.2 FOUNDATION WORLD MODEL TRAINING

We start on the top of the OpenSora (Zheng et al., 2024) model with newly initialized projection layers. The foundation world model with batch size  $B = 12$ , training iterations of 48K, and learning rate of  $1e - 4$  with Adam optimizer.

### B.3 FOUNDATION POLICY MODEL AND LOW-LEVEL POLICY MODEL

The latent action model uses an ST-transformer equipped with a frozen DINO-v2 pretrained ViT image encoder, following the latent action model’s image encoder. The foundation policy model consists of 12 layers of spatial and temporal attentions, each with 12 attention heads and hidden dimension as 768 and a patch size of 14. In total the policy model has 138M parameters. We use frozen CLIP features for text instructions. We pretrain the foundation policy model with batch size  $B = 128$ , training iterations of 124K, and learning rate of  $1e - 4$  with Adam optimizer.

The low-level policy model add extra 118M parameters on top of the foundation policy model. We use a sub-task length of  $\tau = 3$  for finetuning the low-level policy model on RT-1 dataset. We finetune the low-level policy model with batch size  $B = 128$ , training iterations of 32K, and learning rate of  $1e - 4$  with Adam optimizer.

## C ADDITIONAL ABLATION RESULTS

### C.1 DATASET ABLATION FOR LATENT ACTION MODEL

We compare two different setting for the pre-training dataset: only use robotic dataset (robot data), and use both robotic and human activity dataset (mixed data). We evaluate the validation loss on the latent action model on the RT-1 dataset, which is held out from the pretraining dataset and serves for OOD evaluation. Validation loss of the latent action model assesses the extent to which the IDM and FDM can jointly generate latent actions and recover goal states from these latent actions conditioned on states on the unseen dataset. The results are shown in Table 2. We find that the OOD validation loss is greatly reduced by adding human activity dataset. This may be due to the diversity of human videos, which comprise real daily life environments with lots of diverse background and objects. This results demonstrate that it is promising to leverage human data for improving robot tasks under the IGOR framework.

| Validation Loss |       |
|-----------------|-------|
| Robot Data      | 0.145 |
| Mixed Data      | 0.112 |

Table 2: Validation loss on held-out dataset (RT-1) with different training data.
